# Supplementary material
Source: PubMed Central journal article supplement (PMC4475944)
Supplement: pnas.1509022112.sapp.pdf [file pnas.1509022112.sapp.pdf]

## Figure legends

**Figure S1.** *wg* expression patterns in imaginal discs are conserved between two *Drosophila* species. *In situ* hybridizations with third instar larval imaginal discs. (A) *D. melanogaster* wing disc. (B) *D. melanogaster* eye-antennal disc. (C) *D. melanogaster* leg disc. (D) *D. guttifera* wing disc. (E) *D. guttifera* eye-antennal disc. (F) *D. guttifera* leg disc. All discs are oriented with anterior to the left and dorsal on top.

**Figure S2.** *wg* expression in longitudinal vein tips and campaniform sensilla of the pupal wing is unique to *D. guttifera*. *In situ* hybridization for the *wg* gene is shown in pupal wings of various species. (A) *Drosophila melanogaster*. (B) *D. guttifera*. (C) *D. deflecta*. (D) *D. nigromaculata*. (E) *D. palustris*. (F) *D. quinaria*. *D. melanogaster* belongs to *melanogaster* species-group of the subgenus *Sophophora*, while the other species belong to the *quinaria* species group of the subgenus *Drosophila*. All probes are species-specific.

**Figure S3.** Map of the Wnt region of *D. melanogaster* and *D. guttifera*. Vertical bars connected with black lines indicate sequences of 40bp or longer with 100% sequence conservation between species. Red lines indicate conserved but inverted sequences. Numbered horizontal solid bars indicate DNA fragments tested by transgenic reporter assays. *D. melanogaster* fragments were tested in transgenic *D. melanogaster* using phiC31 integration. *D. guttifera* fragments were tested in transgenic *D. guttifera* using the *piggyBac* transposon.

**Figure S4.** The novel activity of the *D. guttifera* gutCV-T enhancer arose within a conserved enhancer. Sequence alignment of the gutCV-T enhancer and the orthologous defCV enhancer (Serial Cloner v2.6.1, local alignment, and word size=15 were used). Mismatches are marked with a #. Red bars indicate identical sequence matches >10bp with the melCV-core enhancer from *D. melanogaster*. The extent of collinear sequence conservation (with no significant rearrangements) between the two species indicates that a small change or an accumulation of small changes is responsible for the new enhancer activity in the vein tips.

**Figure S5.** Expression patterns of four *Wnt* genes in pupal wings of *D. guttifera* visualised by *in situ* hybridizations. (A) *Wnt4*. (B) *wingless*. (C) *Wnt6*. (D) *Wnt10*.

**Figure S6.** *wingless* is the predominant *Wnt* gene expressed in the pupal thorax. *Wnt* genes expressed in the pupal thorax (top) and embryo (middle) were detected by RT-PCR and reaction products profiled by gel electrophoresis. Control reactions from genomic DNA are shown at the bottom

**Figure S7.** *Cis*- and *trans*-regulatory changes are responsible for the novel campaniform sensillum expression of *wg* in *D. guttifera*. (A) In the *D. melanogaster* pupal wing, the melCS enhancer shows no restricted expression (EGFP, green). (B) In the *D. guttifera* pupal wing, the melCS enhancer shows no expression (DsRed, magenta). (C) *D. melanogaster* pupal wing, the gutCS enhancer shows no restricted expression (EGFP, green). (E): *D. guttifera* pupal wing, the gutCS enhancer drives reporter expression in the campaniform sensillum (DsRed, magenta).

**Figure S8.** *Cis*- and *trans*-regulatory changes are responsible for the striped expression of *wg* in the pupal thorax of *D. guttifera*. (A) *D. melanogaster* pupal thorax, the melTS fragment shows no stripe expression (EGFP, green). (B) *D. guttifera* pupal thorax, the melTS fragment shows no stripe expression (DsRed, Magenta). (C) *D. melanogaster* pupal thorax, the guts enhancer is expressed in incomplete stripes (EGFP, green). (D) *D. guttifera* pupal thorax, the gutTS enhancer drives full stripe expression which corresponds to the adult pigmentation pattern (DsRed, magenta).

*D. melanogaster*

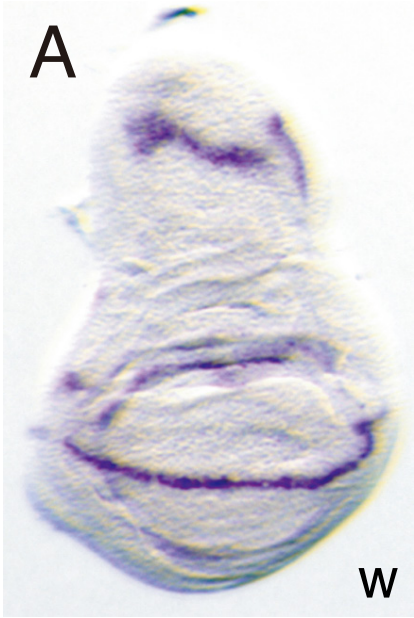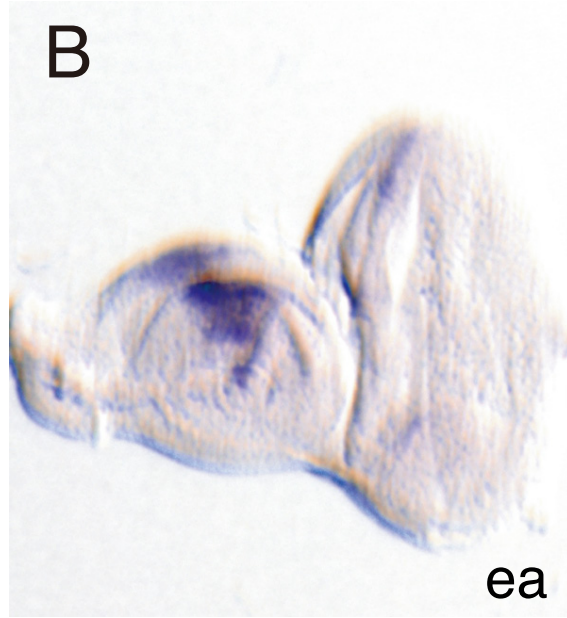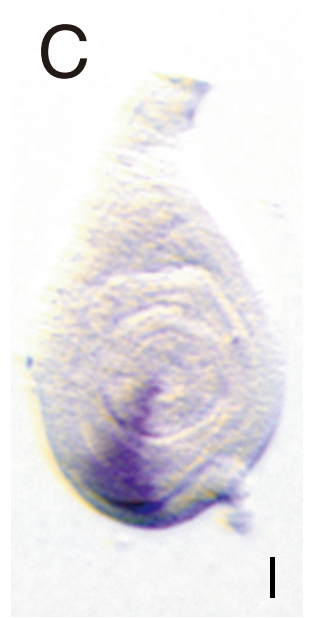

*D. guttifer*

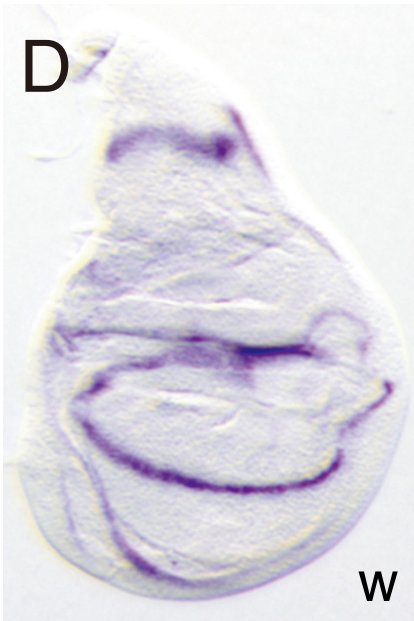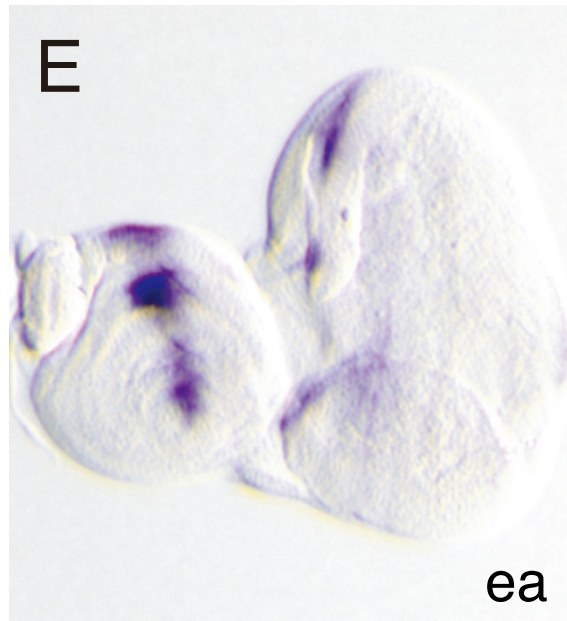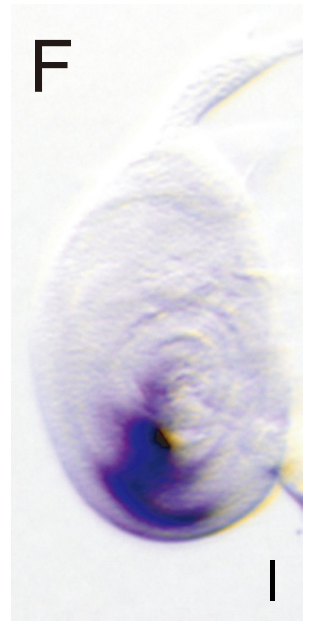

Figure. S1

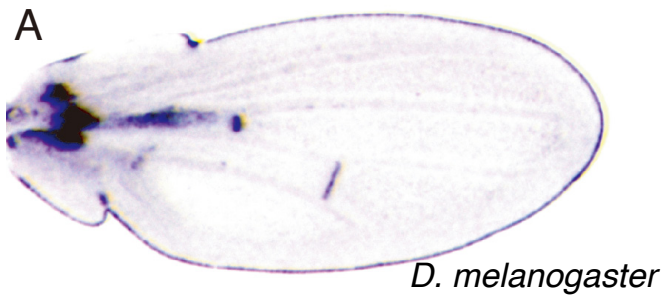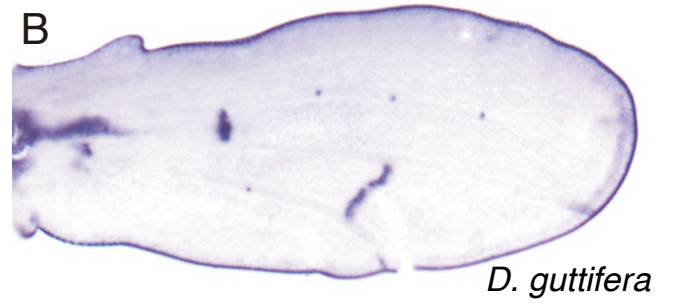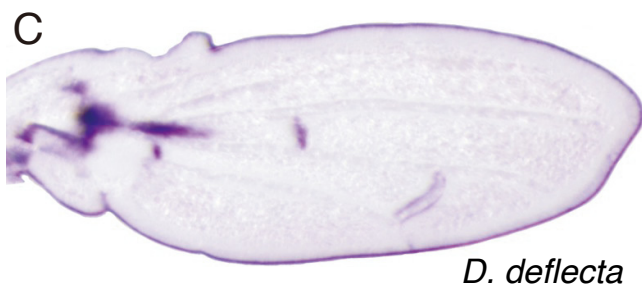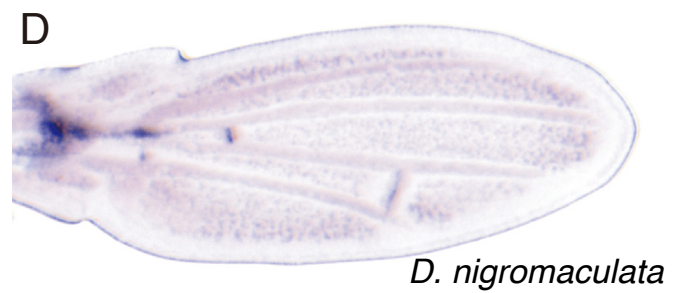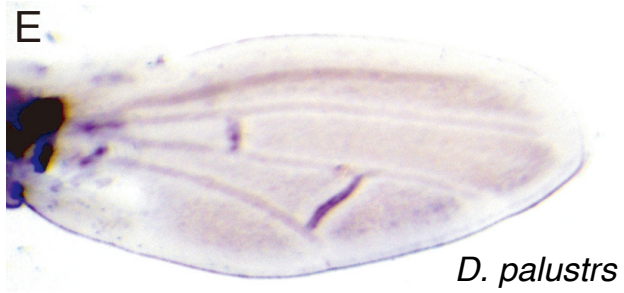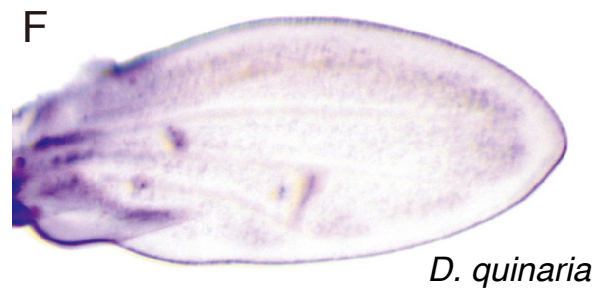

Figure. S2

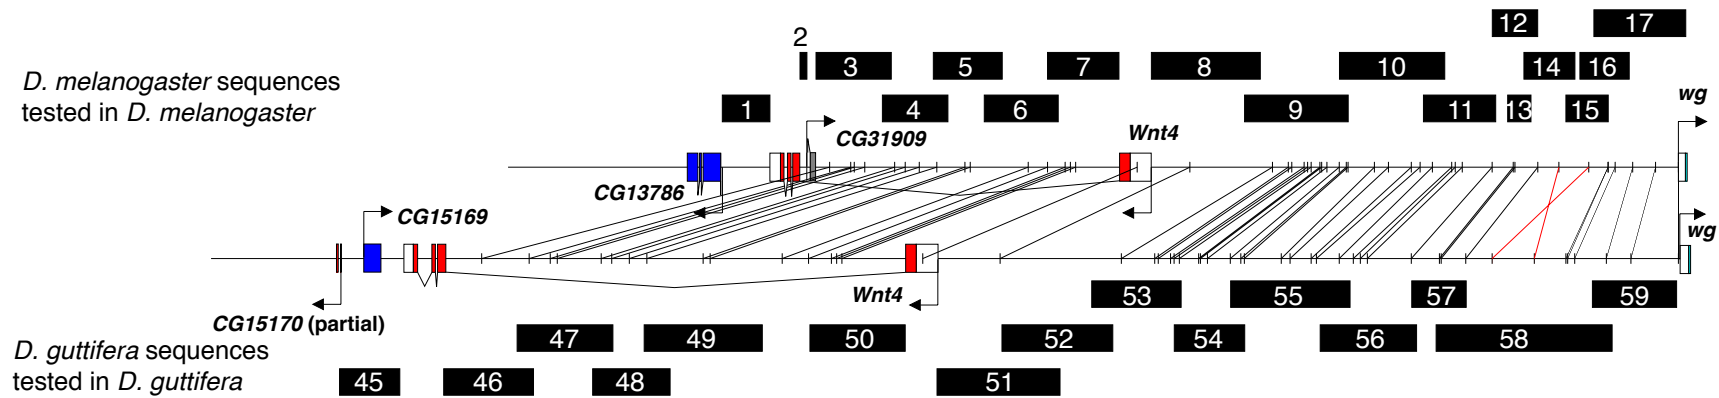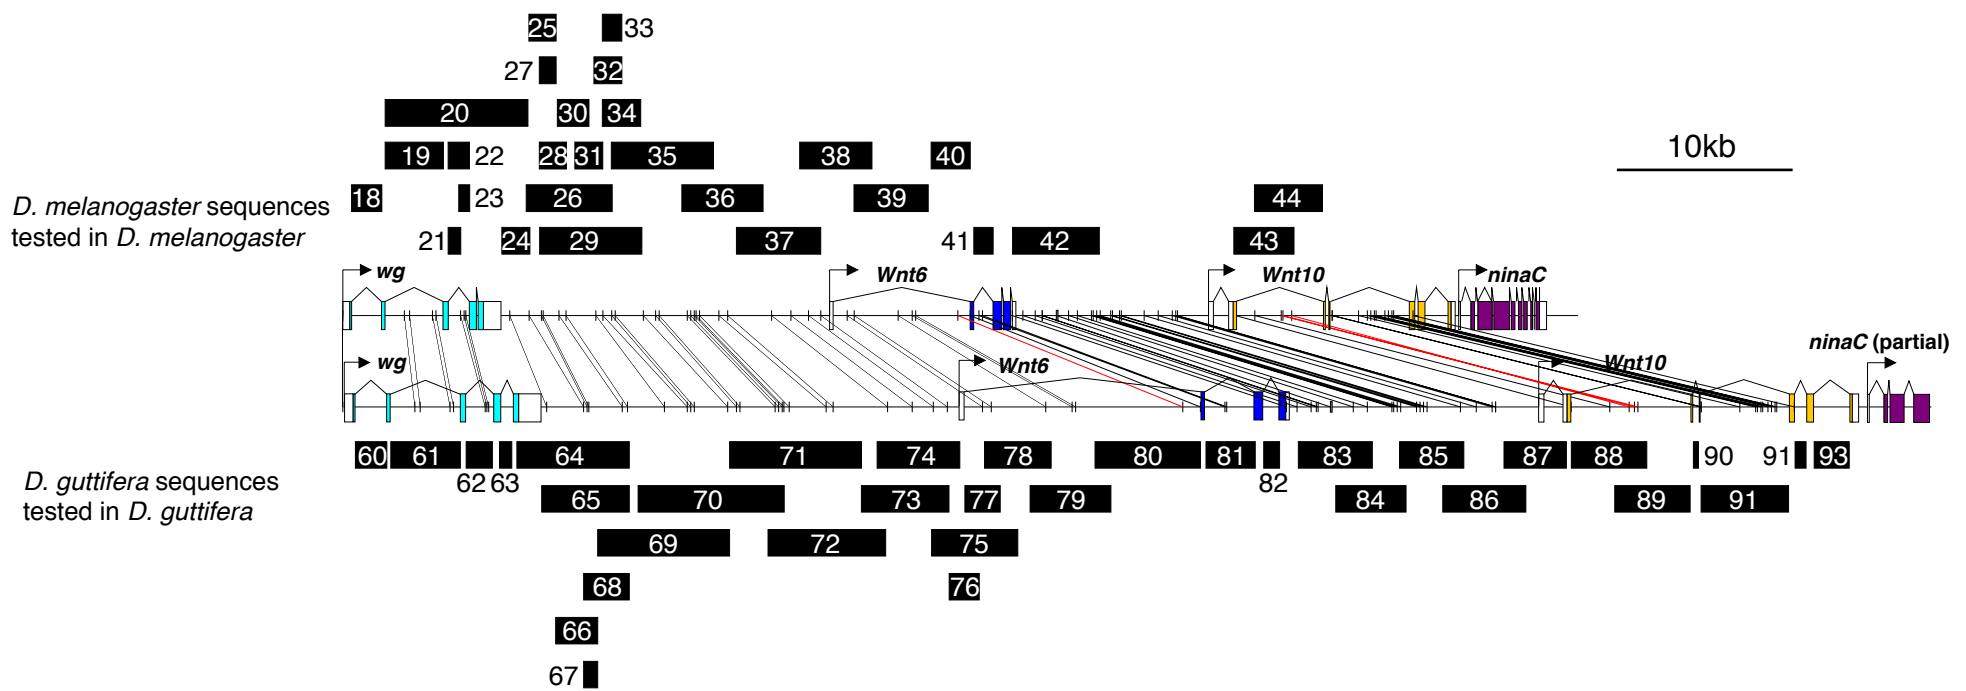

Figure. S3



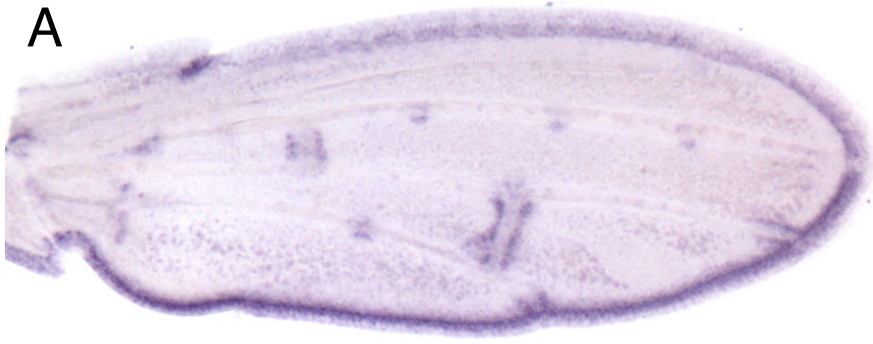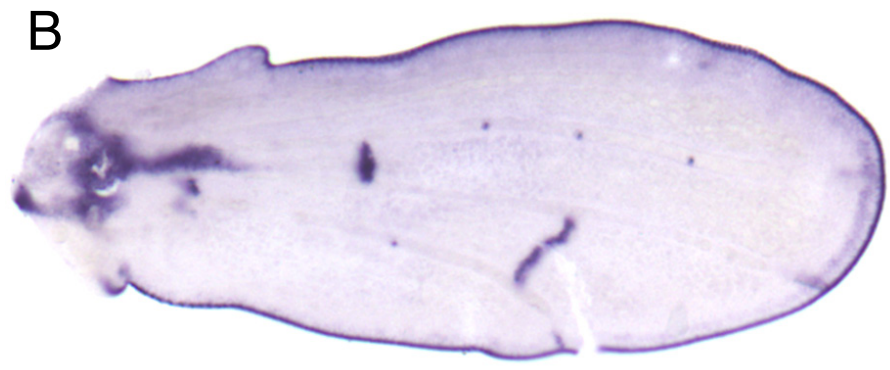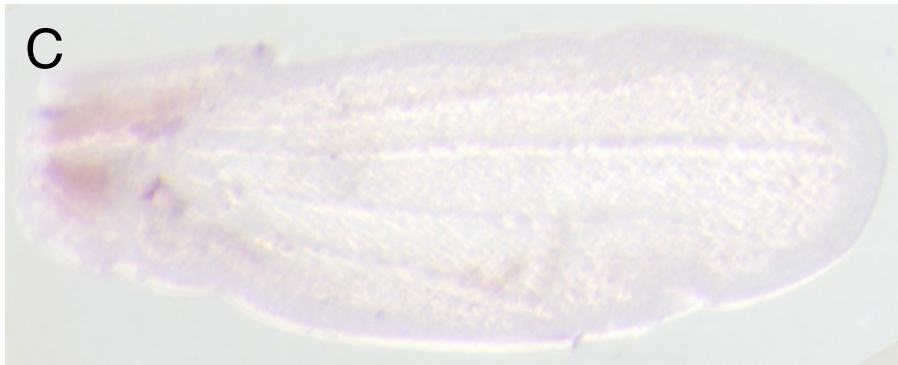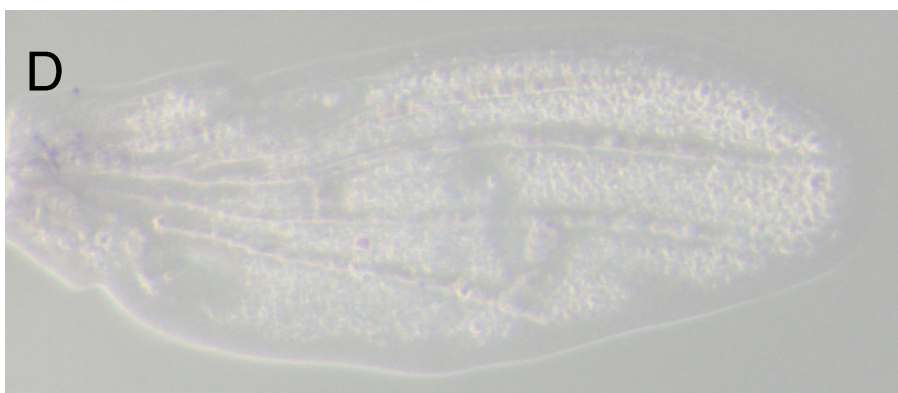

Figure. S5

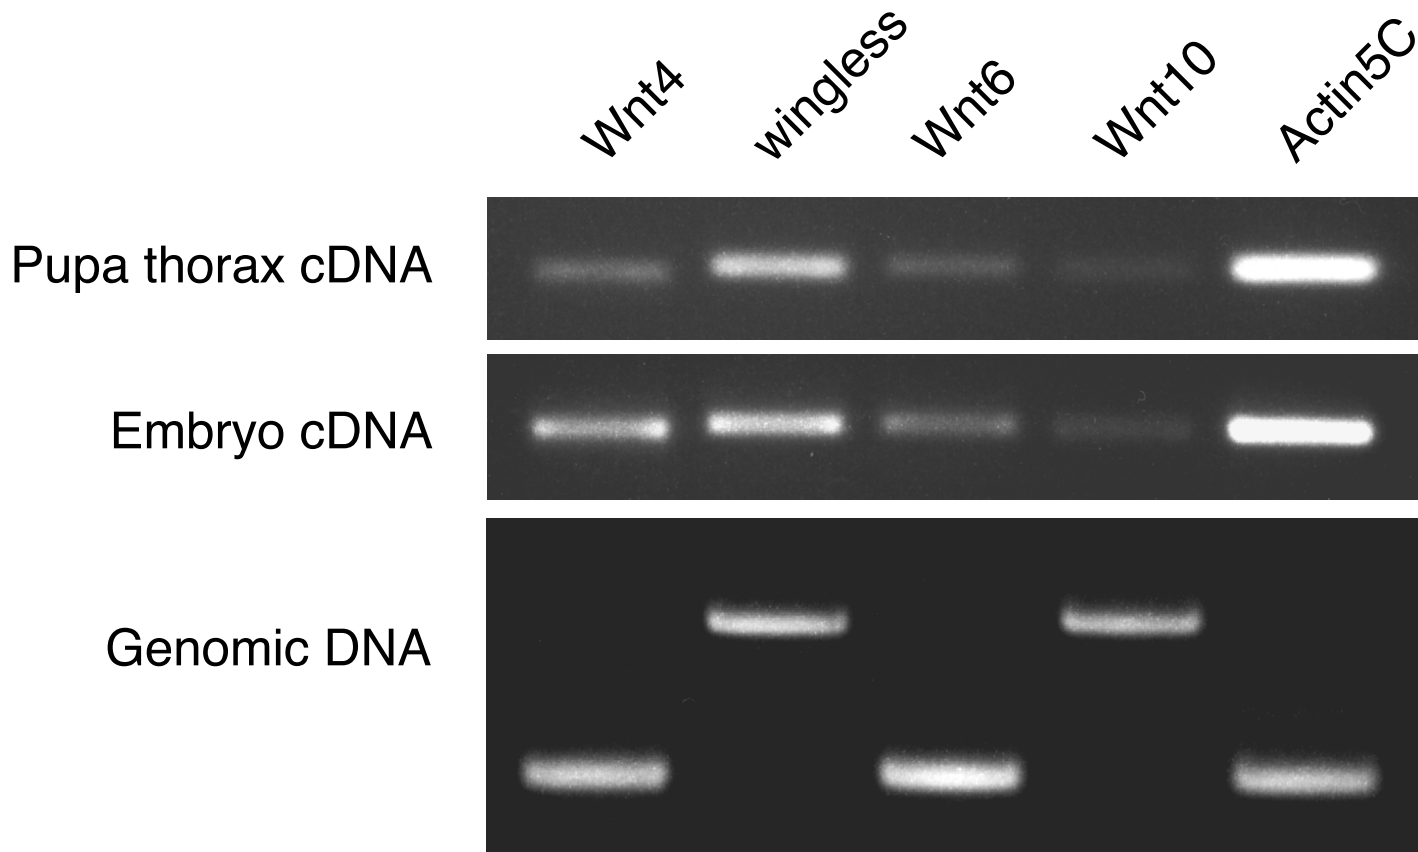

Figure. S6

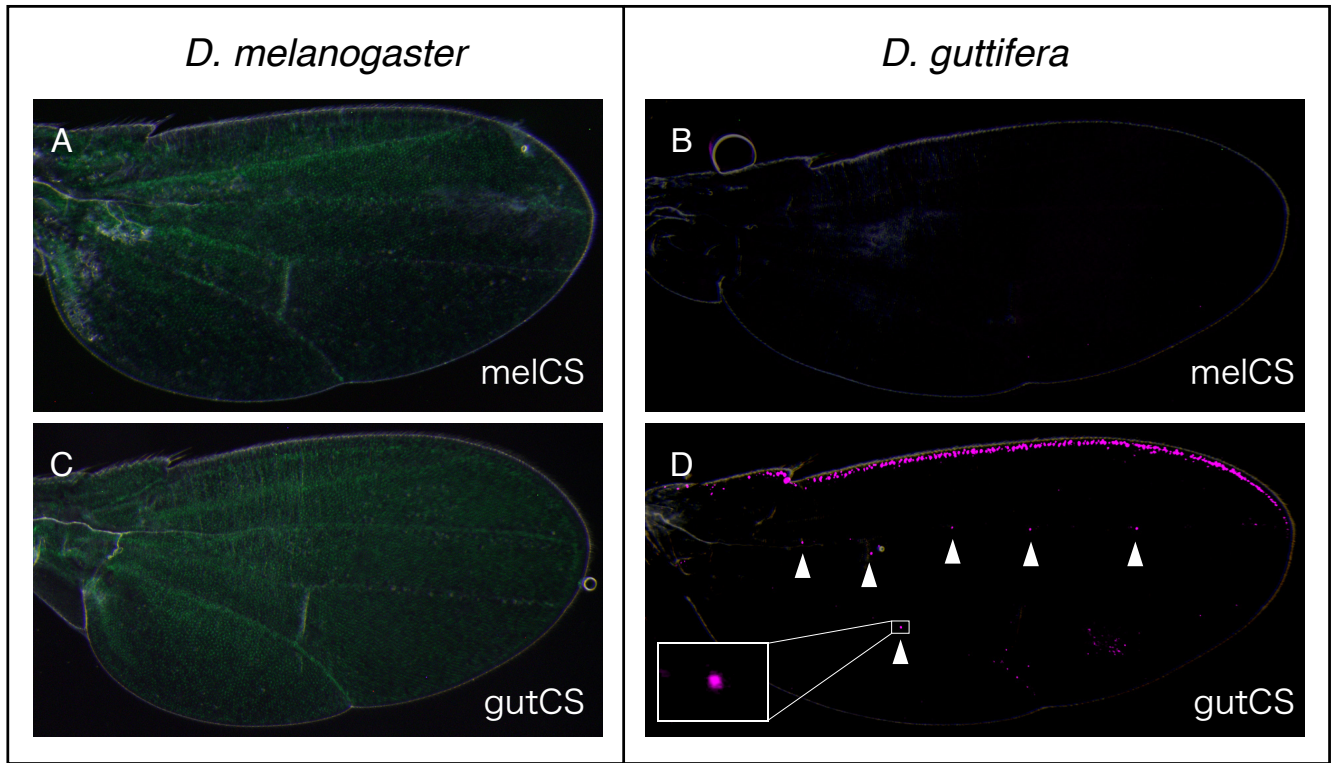

Figure. S7



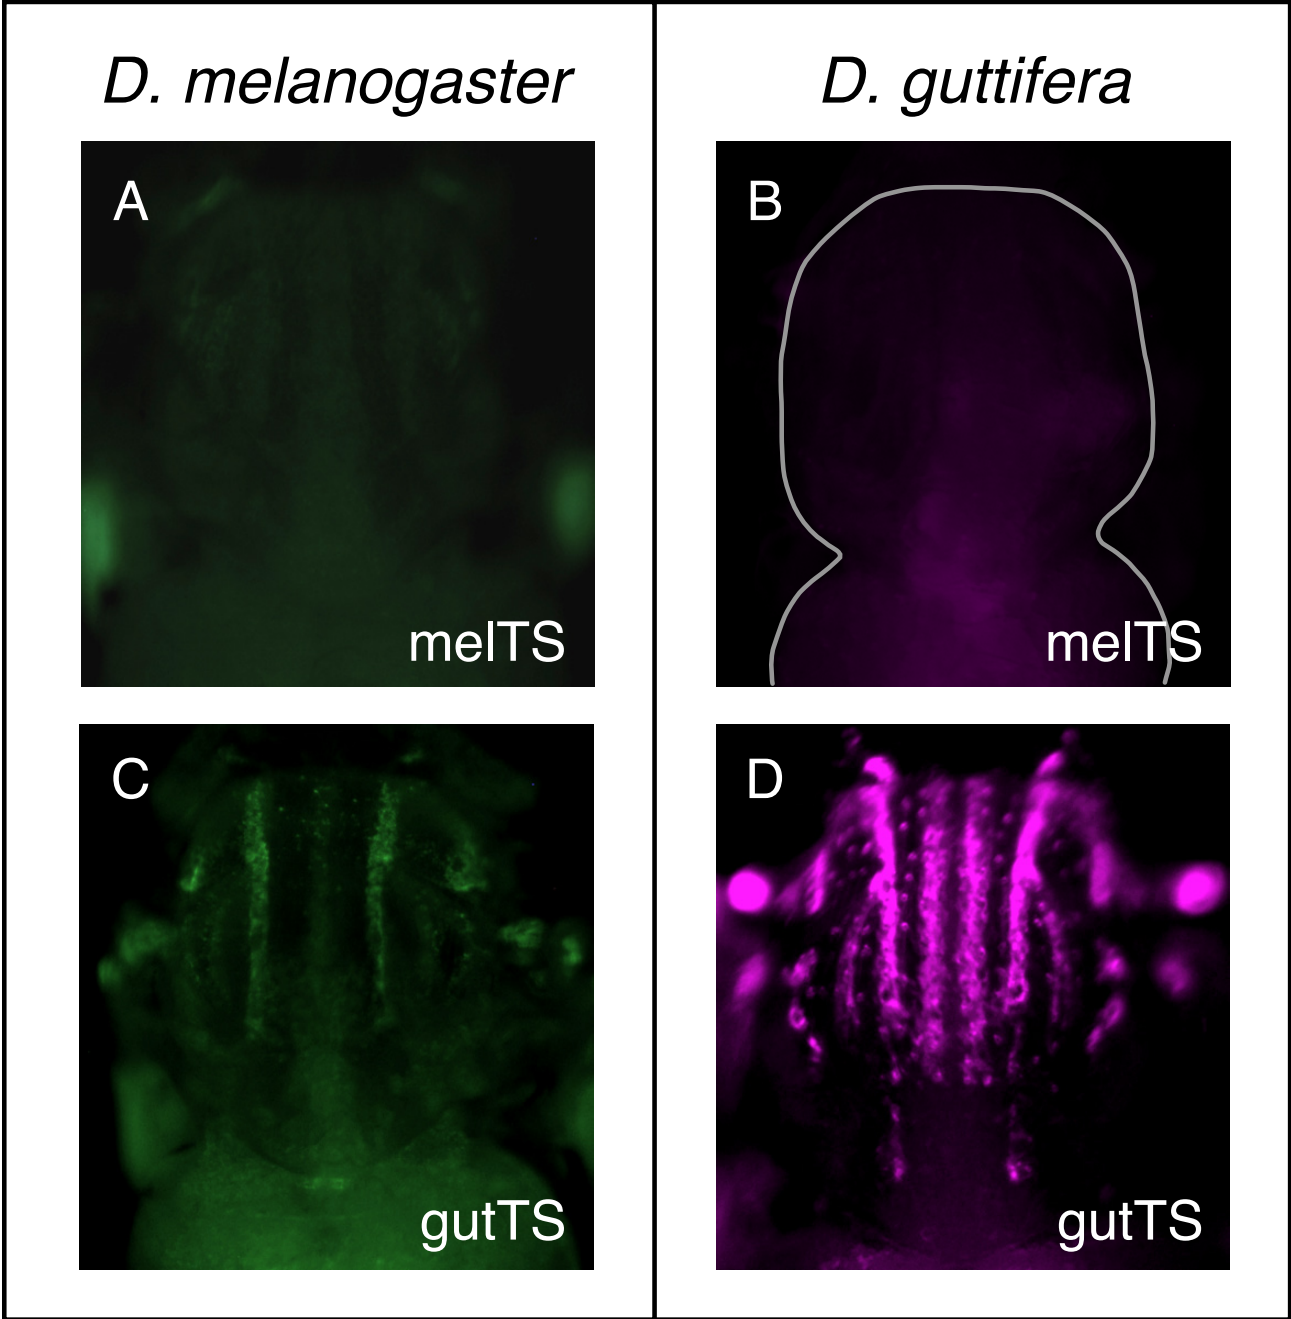

Figure. S8

Table S1. Primers used in the study.

| Primers for enhancer screening (Figure S3) | Restriction site | Fragment in FigS3 | Host species | Template specie | Cloning ststem |
|--------------------------------------------|------------------|-------------------|--------------|-----------------|----------------|
| TCATGGCGCGCGAAATGTTGCCCAACCCGA             | AscI             | 1                 | melanogaster | melanogaster    | S3aG           |
| ATCACCTGCAGGCAAAACTGAAATGAAATATAAAGTTTCAC  | SbfI             | 1                 | melanogaster | melanogaster    | S3aG           |
| TCATGGCGCGCCTGGCAGACATAAAGTATTCGAAATT      | AscI             | 2                 | melanogaster | melanogaster    | S3aG           |
| ATCACCTGCAGGAGTTTTCTGACTGTAGGGTCTATT       | SbfI             | 2                 | melanogaster | melanogaster    | S3aG           |
| TCATGGCGCGCGACAGGTGGGATTTGAAAAATGTA        | AscI             | 3                 | melanogaster | melanogaster    | S3aG           |
| ATCACCTGCAGGCAAAAGGATGCGCTTTTTATGATGAA     | SbfI             | 3                 | melanogaster | melanogaster    | S3aG           |
| TCATGGCGCGCCGAAAAACCGCAAGACAAAACGT         | AscI             | 4                 | melanogaster | melanogaster    | S3aG           |
| AACACCTGCAGCGTGGCAGCATTGATTTGTTTAGA        | SbfI             | 4                 | melanogaster | melanogaster    | S3aG           |
| TCATGGCGCGCGGAAACGCAATCAACATTAAGT          | AscI             | 5                 | melanogaster | melanogaster    | S3aG           |
| AACGCTGCAGGGGTATTTAATTCAATTTGTGGCT         | SbfI             | 5                 | melanogaster | melanogaster    | S3aG           |
| ACTAGCGCGCGTTTGACATTAACGCGTGTAAATTC        | AscI             | 6                 | melanogaster | melanogaster    | S3aG           |
| AACGCTGCAGGCATCGCCATGTGGACCA               | SbfI             | 6                 | melanogaster | melanogaster    | S3aG           |
| ACTTGGCGCGCTCATAAAACGCGCCATCAAAAACGACA     | AscI             | 7                 | melanogaster | melanogaster    | S3aG           |
| AACGCTGCAGGAGTCAATCTAGAGCTACTCCCAT         | SbfI             | 7                 | melanogaster | melanogaster    | S3aG           |
| ACTTGGCGCGCATCTGAATCATGACAGCCGA            | AscI             | 8                 | melanogaster | melanogaster    | S3aG           |
| AACGCTGCAGGCAAAACATCACGTAACAATTGAGCA       | SbfI             | 8                 | melanogaster | melanogaster    | S3aG           |
| ACTAGCGCGCCAGCGTGGCTAATTAGCACAA            | AscI             | 9                 | melanogaster | melanogaster    | S3aG           |
| AACGCTGCAGGCAAAAGATAAGAGCAGCGCCATA         | SbfI             | 9                 | melanogaster | melanogaster    | S3aG           |
| ACTTGGCGCGCCGGTAATATGAGCAGTAATAAAATTTGA    | AscI             | 10                | melanogaster | melanogaster    | S3aG           |
| AACGCTGCAGGCTAAGAGTTCTAATTGAGATGA          | SbfI             | 10                | melanogaster | melanogaster    | S3aG           |
| ACTTGGCGCGCAGTTTTGGATGTTTTATCGCTTGATT      | AscI             | 11                | melanogaster | melanogaster    | S3aG           |
| AACGCTGCAGGAAAGGAACACTGTTTCATCGCACA        | SbfI             | 11                | melanogaster | melanogaster    | S3aG           |
| TCTTGGCGCGCCTAATATGTGTAACCCAGTTAGT         | AscI             | 12                | melanogaster | melanogaster    | S3aG           |
| AACGCTGCAGGACAGGTGATAATTATATAATTTGTGAC     | SbfI             | 12                | melanogaster | melanogaster    | S3aG           |
| TCTTGGCGCGGAATTCCTGTGAACCTCCAGCA           | AscI             | 13                | melanogaster | melanogaster    | S3aG           |
| AACGCTGCAGGGAATTCCTCGATCTTCGAGATACTC       | SbfI             | 13                | melanogaster | melanogaster    | S3aG           |
| TCATGGCGCGCAAAACTGTGAAATGCTGAAAGAACG       | AscI             | 14                | melanogaster | melanogaster    | S3aG           |
| AACGCTGCAGGTTGTTGGCTACCGATGGCTTGA          | SbfI             | 14                | melanogaster | melanogaster    | S3aG           |
| AAGGAAAAAGCGCGCCCGATTCTCCAATTCTCGAAT       | SbfI             | 15                | melanogaster | melanogaster    | S3aG           |
| AAGGAAAAACCTGCAGGGGGCTTTAGTTACGCTTTG       | AscI             | 15                | melanogaster | melanogaster    | S3aG           |
| AAGGAAAAAGCGCGCCCTGGAACAAGGGCAGCCACTTG     | AscI             | 16                | melanogaster | melanogaster    | S3aG           |
| AAGGAAAAAGCGCGCCCGGGTTCCAGGTTCCAGG         | SbfI             | 16                | melanogaster | melanogaster    | S3aG           |
| AAGGAAAAAGCGCGCCCAAGTAATATCGACCCCTTCCTT    | AscI             | 17                | melanogaster | melanogaster    | S3aG           |
| AAGGAAAAACCTGCAGGTGACGGCACACACTCTCACAC     | SbfI             | 17                | melanogaster | melanogaster    | S3aG           |
| AACGCTGCAGGTAAGTTCATTGAATATTTCCATTAATTTG   | SbfI             | 18                | melanogaster | melanogaster    | S3aG           |
| TCTTGGCGCGCCTGAAAGAAAATGAGCCAGAAAAC        | AscI             | 18                | melanogaster | melanogaster    | S3aG           |
| AAGGAAAAAGCGCGCCCTTCACTGCAGGCCCT           | AscI             | 19                | melanogaster | melanogaster    | S3aG           |
| AAGGAAAAACCTGCAGGGCAGTGCCAACACCAGT         | SbfI             | 19                | melanogaster | melanogaster    | S3aG           |
| AAGGAAAAACCTGCAGGCTGGAACCTGCTCGACGA        | AscI             | 20                | melanogaster | melanogaster    | S3aG           |
| AAGGAAAAAGCGCGCCGGTTATGAGATGCCCA           | SbfI             | 20                | melanogaster | melanogaster    | S3aG           |
| AAGGAAAAACCTGCAGGATTCCGGTTCAAGTTCTC        | SbfI             | 21                | melanogaster | melanogaster    | S3aG           |
| AAGGAAAAAGCGCGCCGCCATAACAAGTAATAAAAT       | AscI             | 21                | melanogaster | melanogaster    | S3aG           |
| AAGGAAAAACCTGCAGGATTCCGGTTCAAGTTCTC        | SbfI             | 22                | melanogaster | melanogaster    | S3aG           |
| AAGGAAAAAGCGCGCCGCACTCCTGTGCGCATCTC        | AscI             | 22                | melanogaster | melanogaster    | S3aG           |
| AAGGAAAAACCTGCAGGTTGGGGCTAGAAAGTAGCAC      | SbfI             | 23                | melanogaster | melanogaster    | S3aG           |
| AAGGAAAAAGCGCGCCGCACTCCTGTGCGCATCTC        | AscI             | 23                | melanogaster | melanogaster    | S3aG           |
| AACGCTGCAGGGCCAAGTGAATTCATTGGTAC           | SbfI             | 24                | melanogaster | melanogaster    | S3aG           |
| ACTTGGCGCGCCTCGTTAGTTTTATTGATTAGGAGCA      | AscI             | 24                | melanogaster | melanogaster    | S3aG           |
| AAGGAAAAACCTGCAGGGAGCACAAAGACAGCCC         | SbfI             | 25                | melanogaster | melanogaster    | S3aG           |
| AAGGAAAAAGCGCGCCGCCAACGAGCGTGTAAATA        | AscI             | 25                | melanogaster | melanogaster    | S3aG           |
| ATATGTGCGAGCATTGCTCCTAATCAATAAACTAA        | Sall             | 26                | melanogaster | melanogaster    | S3aG           |
| ACTAGCGCGCCTCAGCCTCGAAACAATTGC             | AscI             | 26                | melanogaster | melanogaster    | S3aG           |
| AAGGAAAAACCTGCAGGAGCGGATCGATGGTTTG         | SbfI             | 27                | melanogaster | melanogaster    | S3aG           |
| AAGGAAAAAGCGCGCCATCCTTGTGTGAGCCTG          | AscI             | 27                | melanogaster | melanogaster    | S3aG           |
| AACGCTGCAGGGCAGCGATCGATGGTTTTG             | SbfI             | 28                | melanogaster | melanogaster    | S3aG           |
| ACTAGCGCGCGCAACGCTGCATAATGGAA              | AscI             | 28                | melanogaster | melanogaster    | S3aG           |
| AACGCTGCAGGGCAGCGGATCGATGGTTTTG            | SbfI             | 29                | melanogaster | melanogaster    | S3aG           |
| ACTAGCGCGCCTCAGCCTCGAAACAATTGC             | AscI             | 29                | melanogaster | melanogaster    | S3aG           |
| ATCGCTGCAGGACACGCATGTAACATTGCCATT          | SbfI             | 30                | melanogaster | melanogaster    | S3aG           |
| ACTTGGCGCGCTTGTATCTTCTCACAATCAAGGT         | AscI             | 30                | melanogaster | melanogaster    | S3aG           |
| ATCGCTGCAGGGTGCGCCAATTTGTTAACT             | SbfI             | 31                | melanogaster | melanogaster    | S3aG           |

|                                              |       |    |              |              |      |
|----------------------------------------------|-------|----|--------------|--------------|------|
| ACTTGGCGCGCCAAAGCAACAAATTGAAACTAAATACTT      | AscI  | 31 | melanogaster | melanogaster | S3aG |
| AACGCGCTGCAGGGAACAGGTGCTGAGCAAATG            | SbfI  | 32 | melanogaster | melanogaster | S3aG |
| ACTTGGCGCGCCGCGAATGAAGACGTTTCGTGA            | AscI  | 32 | melanogaster | melanogaster | S3aG |
| AACGCGCTGCAGGAAGTATTTAGTTTCAATTTGTTGCTTTG    | SbfI  | 33 | melanogaster | melanogaster | S3aG |
| ACTTGGCGCGCCATCCTTTGTGGTAGCCTGA              | AscI  | 33 | melanogaster | melanogaster | S3aG |
| AACGCGCTGCAGGAAGTATTTAGTTTCAATTTGTTGCTTTG    | SbfI  | 34 | melanogaster | melanogaster | S3aG |
| ACTTGGCGCGCCGCGAATGAAGACGTTTCGTGA            | AscI  | 34 | melanogaster | melanogaster | S3aG |
| AAGGAAAAAACCCTGCAGGCGCTATTTACACGCTCGTTG      | SbfI  | 35 | melanogaster | melanogaster | S3aG |
| AAGGAAAAAAGCGCGCCGATTTGCGTATGCGCCAT          | AscI  | 35 | melanogaster | melanogaster | S3aG |
| AAGGAAAAAACCCTGCAGGGGAAGATCGGTGCACTC         | SbfI  | 36 | melanogaster | melanogaster | S3aG |
| AAGGAAAAAAGCGCGCCGATCAGCTCCCGTGGACA          | AscI  | 36 | melanogaster | melanogaster | S3aG |
| AACGCGCTGCAGGCTAGTAACTCAACTGAATCGCTCGTA      | SbfI  | 37 | melanogaster | melanogaster | S3aG |
| ACTTGGCGCGCCGGGAGTAGCGTAAAAATGAAATTAAC       | AscI  | 37 | melanogaster | melanogaster | S3aG |
| AACGCGCTGCAGGATCTACAGATACATTAGAAAATATCTCA    | SbfI  | 38 | melanogaster | melanogaster | S3aG |
| ACTTGGCGCGCTGGAATTTCCATTCATTTAACGCAAC        | AscI  | 38 | melanogaster | melanogaster | S3aG |
| AACGCGCTGCAGGCGTCCGCTGGCGTAGACT              | SbfI  | 39 | melanogaster | melanogaster | S3aG |
| ACTTGGCGCGCCATTCCCATCCCATCCCAT               | AscI  | 39 | melanogaster | melanogaster | S3aG |
| AACGCGCTGCAGGAATTCAGTTCAACTTCAAAAACCAAAA     | SbfI  | 40 | melanogaster | melanogaster | S3aG |
| ACTTGGCGCGCGAAAATAGAGGAATCATAGGTTTGA         | AscI  | 40 | melanogaster | melanogaster | S3aG |
| ATCACCTGCAGGGTAAGTACTTTTACAGTCAAAGGA         | SbfI  | 41 | melanogaster | melanogaster | S3aG |
| TCAAGGCGCGCCCTGAAAATAGGAATATAGGATACAT        | AscI  | 41 | melanogaster | melanogaster | S3aG |
| ATCACCTGCAGGGAGTGTCTTCATTATATGTATTACTT       | SbfI  | 42 | melanogaster | melanogaster | S3aG |
| TCTTGGCGCGCGACTGCATTAAAAATCAACTTAATTTCA      | AscI  | 42 | melanogaster | melanogaster | S3aG |
| ATCACCTGCAGGGAGTCTCTCATCTATCTCTAAGAC         | SbfI  | 43 | melanogaster | melanogaster | S3aG |
| ACTTGGCGCGCGCAAAATGCATTTAATTGGCTGA           | AscI  | 43 | melanogaster | melanogaster | S3aG |
| ATCACCTGCAGGGCTAGTAGTTGCAGCTTGTTA            | SbfI  | 44 | melanogaster | melanogaster | S3aG |
| ACTTGGCGCGCGCAACGAAATGGGGTACAGTATTA          | AscI  | 44 | melanogaster | melanogaster | S3aG |
| AACGGGTACCTTCTCGATCAGCCGTAATGAT              | KpnI  | 45 | guttifera    | guttifera    | pBac |
| TCAACCGCGGAAAATGAAATAAAAATAAAAGTTTACATAAAAC  | SacII | 45 | guttifera    | guttifera    | pBac |
| AACGGGTACCTTGCAAAAGAGAATAAACGGTTTCAA         | KpnI  | 46 | guttifera    | guttifera    | pBac |
| TCAACCGCGGTATCCATCAACACTTTGGTTTTATAGT        | SacII | 46 | guttifera    | guttifera    | pBac |
| AACGGGTACCTTTATCTATTGTATCAAACGACAAAAATTTGA   | KpnI  | 47 | guttifera    | guttifera    | pBac |
| TCAACCGCGGATGTGTCTGTAAGATTTTTATTGCAATTTTTATG | SacII | 47 | guttifera    | guttifera    | pBac |
| AACGGGTACCGCGTAACCGCAAGACAACGT               | KpnI  | 48 | guttifera    | guttifera    | pBac |
| TCAACCGCGCGCTGGCAGCATTTGATTTGTTTGA           | SacII | 48 | guttifera    | guttifera    | pBac |
| AACGGGTACCGCAAAACGCAATCAACATTAATAAACTTTT     | KpnI  | 49 | guttifera    | guttifera    | pBac |
| TCAACCGCGCGGTATTTTAATTCATTTGTTGTCATC         | SacII | 49 | guttifera    | guttifera    | pBac |
| AACGGGTAGCTCATAAAACGACCCATCAAAACGA           | NheI  | 50 | guttifera    | guttifera    | pBac |
| TCAACCGCGGGAGTAATTTAACAGTTATTGTGAATATGCT     | SacII | 50 | guttifera    | guttifera    | pBac |
| AACGGGTAGCCTCGTTCCGCACTCGACT                 | NheI  | 51 | guttifera    | guttifera    | pBac |
| TCAACCGCGGCTCGAAATCCGCTTTAATTGAATCA          | SacII | 51 | guttifera    | guttifera    | pBac |
| AACGGGTAGCAAGTCTAACATTTTACAGACACCT           | NheI  | 52 | guttifera    | guttifera    | pBac |
| TCAACCGCGGCAAAACATCAGTAAACAATTGAGCA          | SacII | 52 | guttifera    | guttifera    | pBac |
| AACGGGTAGCAAGCTTGGCAATAACCATGCTCAA           | NheI  | 53 | guttifera    | guttifera    | pBac |
| TCAACCGCGGTGATAAATTTCAAGTTGCCAATAATAAATT     | SacII | 53 | guttifera    | guttifera    | pBac |
| AACGGGTAGCTGCGATATGAAGATTTAAGACATGAAT        | NheI  | 54 | guttifera    | guttifera    | pBac |
| TCAACCGCGGAGTTTTACATTAACAAAAGATAAGAGA        | SacII | 54 | guttifera    | guttifera    | pBac |
| AACGGGTAGCCAGTAATATGAGCAGTAATAAAATTTGAAT     | NheI  | 55 | guttifera    | guttifera    | pBac |
| TACACCGCGGTCTAAGAGTTCTAATTGAGCCAAT           | SacII | 55 | guttifera    | guttifera    | pBac |
| AACGGGTAGCAGTTTTGGATGTTTTATCGCTTGATT         | NheI  | 56 | guttifera    | guttifera    | pBac |
| ACTACCGCGGAAAGGAACACTACTGTTCAATCGCA          | SacII | 56 | guttifera    | guttifera    | pBac |
| AACGGGTAGCCTAATATGTGTAACCCRCGTTAGTTAC        | NheI  | 57 | guttifera    | guttifera    | pBac |
| AACGGGTACCAGGGTATAATTATATAATTTGTGACGGA       | KpnI  | 57 | guttifera    | guttifera    | pBac |
| AACGGGTAGCGATCATCTATATATCTTTTCATAATCCCA      | NheI  | 58 | guttifera    | guttifera    | pBac |
| TCAACCGCGGCGCAATCATTGGCATCTTTGTC             | SacII | 58 | guttifera    | guttifera    | pBac |
| TCAACCGCGGGATCTATAGAATAGAGTATTTAAAAATACTTGA  | SacII | 59 | guttifera    | guttifera    | pBac |
| ATATCTCGAGCATCGATCGACATGACAGTCG              | XhoI  | 59 | guttifera    | guttifera    | pBac |
| TCAACCGCGGAAGTAGCTTGGAAAACTGGGATAAC          | SacII | 60 | guttifera    | guttifera    | pBac |
| AACGGGTAGCGAAAATAGACATAGAAGAGTGATGTA         | NheI  | 60 | guttifera    | guttifera    | pBac |
| TCAACCGCGGAAGTGAATGAAATATGTGAAGAACAAG        | SacII | 61 | guttifera    | guttifera    | pBac |
| AACGGGTAGCGAAAAGAGAGTGA AAAAGCAGAGAGAAT      | NheI  | 61 | guttifera    | guttifera    | pBac |
| AACGGGTAGCAGAARGTGAATCTGCACAACAACGAG         | NheI  | 62 | guttifera    | guttifera    | pBac |
| AACGGGTACCCATGCCRTGGCATTGCACTC               | KpnI  | 62 | guttifera    | guttifera    | pBac |
| TCAACCGCGGAAACTTACAAATCAAAAATACTTACTGTTTTA   | SacII | 63 | guttifera    | guttifera    | pBac |

|                                              |       |    |           |           |      |
|----------------------------------------------|-------|----|-----------|-----------|------|
| AACGGCTAGCGTAAAGAAGAAAATGAAATGAAAAGTGA       | NheI  | 63 | guttifera | guttifera | pBac |
| TCAACCGGGAAAGATTATACACACGTGCTGTAAAG          | SacII | 64 | guttifera | guttifera | pBac |
| AACGGCTAGCGGAAAGCGTGCATAATGGAA               | NheI  | 64 | guttifera | guttifera | pBac |
| TCAACCGGGAAATAAGAATTGCGAATGCAATGCACA         | SacII | 65 | guttifera | guttifera | pBac |
| AACGGCTAGCGGAAAGCGTGCATAATGGAA               | NheI  | 65 | guttifera | guttifera | pBac |
| TCAACCGGGAAAAAAGTGATCGTGCTACATGTGT           | SacII | 66 | guttifera | guttifera | pBac |
| AACGGCTAGCAGCACAACAATTGCCACTTAATTAACA        | NheI  | 66 | guttifera | guttifera | pBac |
| TCAACCGGGGACATTGCTCCTAATCAATAAACTAA          | SacII | 67 | guttifera | guttifera | pBac |
| AACGGCTAGCGGAAAGCGTGCATAATGGAA               | NheI  | 67 | guttifera | guttifera | pBac |
| TCAACCGGGGACATTGCTCCTAATCAATAAACTAA          | SacII | 68 | guttifera | guttifera | pBac |
| AACGGCTAGCAGCACAACAATTGCCACTTAATTAACA        | NheI  | 68 | guttifera | guttifera | pBac |
| ATATCTCGAGGACATTGCTCCTAATCAATAAACTAA         | XhoI  | 69 | guttifera | guttifera | pBac |
| TCTGGCTAGCTGCCAATTTATCGATCAACACGCT           | NheI  | 69 | guttifera | guttifera | pBac |
| TCAACCGGGTGCAGCAACTTTGTTAACTTTG              | SacII | 70 | guttifera | guttifera | pBac |
| AACGGCTAGCGGATTCATAATATCATATTTCACTTCCT       | NheI  | 70 | guttifera | guttifera | pBac |
| TCAACCGGGCGGCGAACAATAATGCGAATGAA             | SacII | 71 | guttifera | guttifera | pBac |
| AACGGCTAGCTTTTTTAAAGATTTCTTTGATGAAAATTAGTAAG | NheI  | 71 | guttifera | guttifera | pBac |
| TCAACCGGGGCTGACGTTTAGTCATAAAATATTTCCA        | SacII | 72 | guttifera | guttifera | pBac |
| AACGGCTAGCGGCGTGATTCAACAATAAACAAA            | NheI  | 72 | guttifera | guttifera | pBac |
| TCAACCGGGTGTAGAAAATTTAAGTTTCTCGATAAATG       | SacII | 73 | guttifera | guttifera | pBac |
| AACGGCTAGCAAAATGAAATTAACGCGCGCTTAATCA        | NheI  | 73 | guttifera | guttifera | pBac |
| TCAACCGGGATTTATGACCATTGATAGTGGCGAA           | SacII | 74 | guttifera | guttifera | pBac |
| AACGGCTAGCAGCAGCGCAATTAATCAAGCG              | NheI  | 74 | guttifera | guttifera | pBac |
| TCAACCGGGTCTACAGATACATTAGAAAATATCTCAAA       | SacII | 75 | guttifera | guttifera | pBac |
| AACGGCTAGCTGGAATTTCCATTCTTAACGGCAC           | NheI  | 75 | guttifera | guttifera | pBac |
| TCAACCGGGGCTTTGATTAAGCGCGCTTTA               | SacII | 76 | guttifera | guttifera | pBac |
| AACGGCTAGCGTTTGAATGGTTTTTTGGCATTGAA          | NheI  | 76 | guttifera | guttifera | pBac |
| TCAACCGGGGAGTTCACAGTTAAAGTTGCGAGC            | SacII | 77 | guttifera | guttifera | pBac |
| ATCGGCTAGCCCTTGAACGGCACAGATGAAG              | NheI  | 77 | guttifera | guttifera | pBac |
| TCAACCGGGGACCTTCAAAATGTGACGTTTTGATTTA        | SacII | 78 | guttifera | guttifera | pBac |
| AACGGCTAGCCCGGACGTATCTTTATTTTGC              | NheI  | 78 | guttifera | guttifera | pBac |
| ATATCTCGAGTGGCCAATTTGCCAAAATTAATGCA          | XhoI  | 79 | guttifera | guttifera | pBac |
| TCAACCGGGGAGATTATGACAACCTAATAGCTACAGA        | SacII | 79 | guttifera | guttifera | pBac |
| TCAACCGGGTCCATTGAGGCTATAACGACA               | SacII | 80 | guttifera | guttifera | pBac |
| AACGGCTAGCAGAATATAATTGTAAGAATAAGACTTTTAGA    | NheI  | 80 | guttifera | guttifera | pBac |
| TCAACCGGGAAAGTGAACCTAAATATGTAACACTACAAA      | SacII | 81 | guttifera | guttifera | pBac |
| AACGGCTAGCGTGGGAGGCGAAGGATAAC                | NheI  | 81 | guttifera | guttifera | pBac |
| ATATCTCGAGAAGTAGGCAAGAAAGAAATCCT             | XhoI  | 82 | guttifera | guttifera | pBac |
| AACGGCTAGCGGAAATGAGCAAAAAGAAATGCTT           | NheI  | 82 | guttifera | guttifera | pBac |
| TCAACCGGGATGATTAAGCGTAATTTAATGAAGACAACA      | SacII | 83 | guttifera | guttifera | pBac |
| AACGGCTAGCCAATTAACAATTCATTATCTTAATTTGTCTG    | NheI  | 83 | guttifera | guttifera | pBac |
| TCAACCGGGTGACTTTCCATAAATTAACACAATTTTATTGT    | SacII | 84 | guttifera | guttifera | pBac |
| AACGGCTAGCGACTGCATTAATAAATCAACTTAATTTCA      | NheI  | 84 | guttifera | guttifera | pBac |
| TCAACCGGGGTTAATAAAAAACACATAATGCGTATGTT       | SacII | 85 | guttifera | guttifera | pBac |
| AACGGCTAGCGTTTACAACACAGCAGCGCA               | NheI  | 85 | guttifera | guttifera | pBac |
| TCAACCGGGAGCGCCACATCAACGTCATAA               | SacII | 86 | guttifera | guttifera | pBac |
| AACGGCTAGCACACTTGTACACTTCAAAGGACTT           | NheI  | 86 | guttifera | guttifera | pBac |
| TCAACCGGGGTGATGGTGATTTCATGGCAATTTG           | SacII | 87 | guttifera | guttifera | pBac |
| AACGGCTAGCAACACTTTTGTAGAACACATGAAGAAAT       | NheI  | 87 | guttifera | guttifera | pBac |
| TCAACCGGGAAAGTGAAGCGAGCGTATCTTATA            | SacII | 88 | guttifera | guttifera | pBac |
| AACGGCTAGCTGCCTAAGTGGCTTAGATAGCTAA           | NheI  | 88 | guttifera | guttifera | pBac |
| TCAACCGGGGCTAGTAGTTGCAGCTTGTTA               | SacII | 89 | guttifera | guttifera | pBac |
| AACGGCTAGCGCATATAAATAGACAGTTGAATTTATTA       | NheI  | 89 | guttifera | guttifera | pBac |
| TCAACCGGGAAATAAATCTGCTTCTAATGCGAAAATG        | SacII | 90 | guttifera | guttifera | pBac |
| AACGGCTAGCACATCAGCATAAAAAAGCATAAATAAAGAAAG   | NheI  | 90 | guttifera | guttifera | pBac |
| AACGGGTACCGAGTCCCGAGGTTCCAC                  | KpnI  | 91 | guttifera | guttifera | pBac |
| AACGGCTAGCTTACAGGAGGTAGGAAGAATGAGAA          | NheI  | 91 | guttifera | guttifera | pBac |
| TCAACCGGGAAAGCGAAGAAAATACTAGTTTCAATTACA      | SacII | 92 | guttifera | guttifera | pBac |
| AACGGCTAGCAGAAGTCGAAATGGGCAAGATATTAG         | NheI  | 92 | guttifera | guttifera | pBac |
| TCAACCGGGGAGTGGGAGTTTACGAATTTGAATGT          | SacII | 93 | guttifera | guttifera | pBac |
| AACGGCTAGCAAAAATTTAACAAAAGAAATGTGGGGTTAGATA  | NheI  | 93 | guttifera | guttifera | pBac |

Primers for cis/trans test (Figure 3, 4, 5, S7, S8)

|                                    | Fragment name | Host species | Template specie | Cloning system |
|------------------------------------|---------------|--------------|-----------------|----------------|
| TCAACCGGGAAAAAAGTGATCGTGCTACATGTGT | gutCV-T       | guttifera    | guttifera       | pBac           |

|                                           |       |             |              |              |      |
|-------------------------------------------|-------|-------------|--------------|--------------|------|
| AACGGCTAGCAGCACAAATGGCCACTTAATTAACA       | NheI  | gutCV-T     | guttifera    | guttifera    | pBac |
| AACGGCTGCAGGAAAAAAGTATCGTGCTACATGTGT      | SbfI  | melCV       | melanogaster | melanogaster | S3aG |
| ACTAGGCGCGCCCTCAGCGCTCGAAACAATTGC         | AscI  | melCV       | melanogaster | melanogaster | S3aG |
| AACGGCTGCAGGTAATAAAGTATCGTGCTACATGTGT     | SbfI  | gutCV-T     | melanogaster | guttifera    | S3aG |
| TCTTGGCGCGCCCTCGAGCACAAACAATTGCCACT       | AscI  | gutCV-T     | melanogaster | guttifera    | S3aG |
| TCAACCGCGGATAAAAAGTATCGTGCTACATGTGT       | SacII | defCV       | guttifera    | deflecta     | pBac |
| ATATCTCGAGGACATTGCTCCTAATCAATAAACTAA      | XhoI  | defCV       | guttifera    | deflecta     | pBac |
| TCTGGCTAGCTGCCAATTTATCGATCAACACGCT        | NheI  | gutME       | guttifera    | guttifera    | pBac |
| ATATCTCGAGGACATTGCTCCTAATCAATAAACTAA      | XhoI  | gutME       | guttifera    | guttifera    | pBac |
| AACGGCTGCAGGAAGTATTTAGTTTCAATTTGTTGCTTTG  | SbfI  | melME       | melanogaster | melanogaster | S3aG |
| ACTTggcgccGCGAATGAAGAGCTTTCGTGA           | AscI  | melME       | melanogaster | melanogaster | S3aG |
| AACGGCTGCAGGAAAAAAGTATCGTGCTACATGTGT      | SbfI  | gutCVT5     | melanogaster | guttifera    | S3aG |
| TCTTGGCGCGCAGACCGCGACGATGCGAT             | AscI  | gutCVT5     | melanogaster | guttifera    | S3aG |
| AACGGCTGCAGGACATTGCTCCTAATCAATAAACTAA     | SbfI  | gutCVT-core | melanogaster | guttifera    | S3aG |
| TCTTGGCGCGCCCTCGAGCACAAACAATTGCCACT       | AscI  | gutCVT-core | melanogaster | guttifera    | S3aG |
| TCAACCGCGGGACATTGCTCCTAATCAATAAACTAA      | SacII | gutCVT-core | guttifera    | guttifera    | pBac |
| AACGGCTAGCAGCACAAACAATTGCCACTTAATTAACA    | NheI  | gutCVT-core | guttifera    | guttifera    | pBac |
| ATCACCTGCAGGGCCTAGTAGTTGCAGCTTGTTA        | SbfI  | melCS       | melanogaster | melanogaster | S3aG |
| ACTTGGCGCGCGCAACGAAATGGGTACAGTATTA        | AscI  | melCS       | melanogaster | melanogaster | S3aG |
| ATATCTCGAGGCTAGTAGTTGCAGCTTGTTA           | XhoI  | melCS       | guttifera    | melanogaster | pBac |
| TCAACCGCGGGCAACGAAATGGGTACAGTATTA         | SacII | melCS       | guttifera    | melanogaster | pBac |
| ATCACCTGCAGGGCCTAGTAGTTGCAGCTTGTTA        | SbfI  | gutCS       | melanogaster | guttifera    | S3aG |
| ACTTGGCGCGCGGCATATAAATAGACAGTTTGAATTTATTA | AscI  | gutCS       | melanogaster | guttifera    | S3aG |
| TCAACCGCGGGCCTAGTAGTTGCAGCTTGTTA          | SacII | gutCS       | guttifera    | guttifera    | pBac |
| AACGGCTAGCGGCATATAAATAGACAGTTTGAATTTATTA  | NheI  | gutCS       | guttifera    | guttifera    | pBac |
| ATCACCTGCAGGGAGTCTCTCATCTATCCTAAGAC       | SbfI  | melTS       | melanogaster | melanogaster | S3aG |
| ACTTGGCGCGCGGCAAAATGCATTTAATTGGCTGA       | AscI  | melTS       | melanogaster | melanogaster | S3aG |
| ATATCTCGAGGAGTCTCTCATCTATCCTAAGAC         | XhoI  | melTS       | guttifera    | melanogaster | pBac |
| TCAACCGCGGGCAACGAAATGGGTACAGTATTA         | SacII | melTS       | guttifera    | melanogaster | pBac |
| ATCACCTGCAGGAAGTGCAGGCGAGCGTATCTTATA      | SbfI  | gutTS       | melanogaster | guttifera    | S3aG |
| ACTTGGCGCGCGGCATATAAATAGACAGTTTGAATTTATTA | AscI  | gutTS       | melanogaster | guttifera    | S3aG |
| TCAACCGCGGAAGTGCAGGCGAGCGTATCTTATA        | SacII | gutTS       | guttifera    | guttifera    | pBac |
| AACGGCTAGCTGCCTAACTGGCTTAGATAGCTAA        | NheI  | gutTS       | guttifera    | guttifera    | pBac |

Primers for in situ hybridization

| Gene                   | Target species                                            |
|------------------------|-----------------------------------------------------------|
| CACGTCCAAGCGGAGATGCG   | wg melanogaster                                           |
| GGCGACGGCATGTTCCGGGTG  | wg melanogaster                                           |
| CACGTTACGGGAGATGCG     | wg guttifera, deflecta, nigromaculata, palstris, quinaria |
| GGCGATGGCATATGGGATGATG | wg guttifera, deflecta, nigromaculata, palstris, quinaria |
| CGAACACTTTATATCGGAGCA  | Wnt4 guttifera                                            |
| GAGTCATGTGCAATATTTCCGG | Wnt4 guttifera                                            |
| GCCATTCGCGATGCGATG     | Wnt6 guttifera                                            |
| CTAGAGGCATGTGTTGACCTC  | Wnt6 guttifera                                            |
| GCCGTGTCCAATAACATGGAGT | Wnt10 guttifera                                           |
| CCTGTATATCGCTCCTAGAT   | Wnt10 guttifera                                           |

Primers for RT-PCR

| Gene                      | Template species |
|---------------------------|------------------|
| GAGCAGCAACTGTTGCTGTC      | Wnt4 guttifera   |
| GCCAATCCTTTGTTACATGATTC   | Wnt4 guttifera   |
| GAGTGCAAATGCCACGGCAT      | wg guttifera     |
| GGCTCCAGATAGACAATATCCTT   | wg guttifera     |
| GCCATTCGCGATGCGATG        | Wnt6 guttifera   |
| AATTATGTTTACTGACTCTGCCGAG | Wnt6 guttifera   |
| GTTATCGGAAAGTGCTTTTGC     | Wnt10 guttifera  |
| CTTCAGCACTTTGCCAAACAATGT  | Wnt10 guttifera  |
| ATGTGTGACGAAGAAGTTGCT     | Act5C guttifera  |
| TAGATGGGCACAGTGTGG        | Act5C guttifera  |
